# Supplementary material for: Built Shallow to Maintain Homeostasis and Persistent Infection: Insight into the Transcriptional Regulatory Network of the Gastric Human Pathogen Helicobacter pylori
Source: PubMed Central journal article supplement (PMC2883586; doi:10.1371/journal.ppat.1000938), 2010-06-10

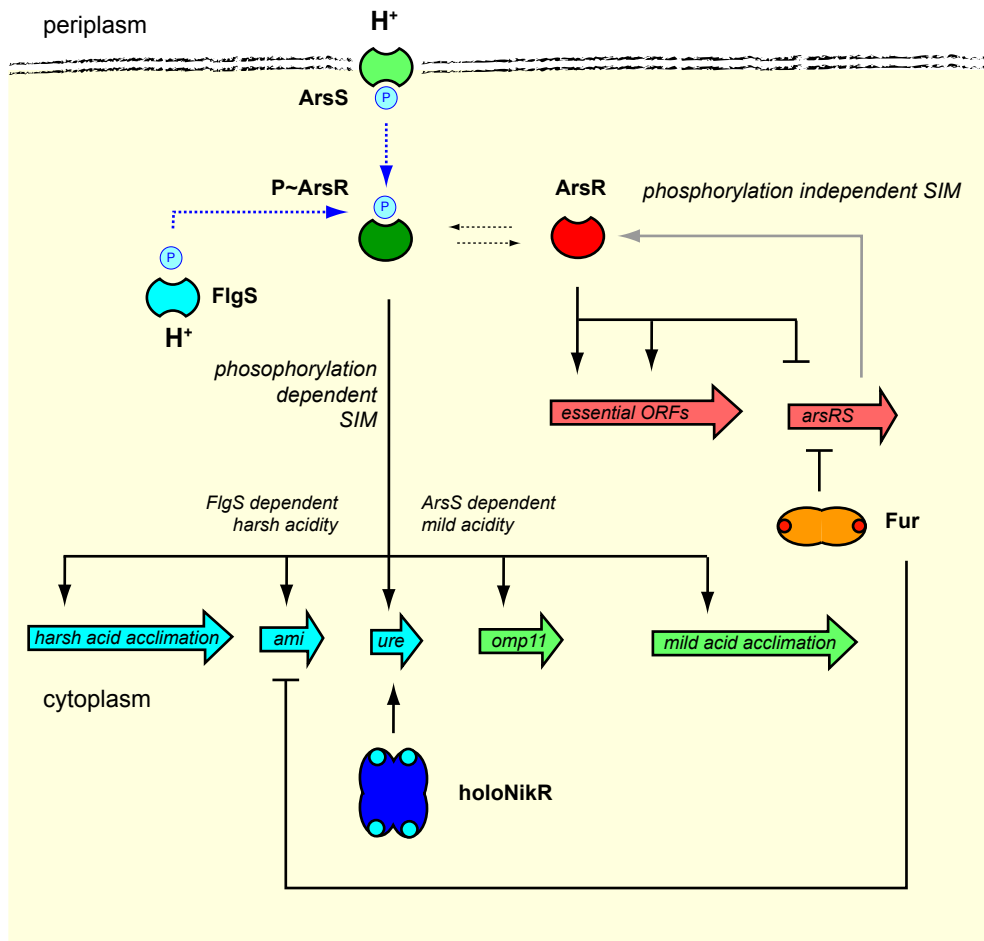

Supplement: ppat.1000938.s002.pdf [file ppat.1000938.s002.pdf]
